# Supplementary material for: A Single Amino Acid in the Polymerase Acidic Protein Determines the Pathogenicity of Influenza B Viruses
Source: PubMed Central journal article supplement (PMC6002706; doi:10.1128/jvi.00259-18), 2018-06-13
Supplement: JVI.00259-18_zjv013183633s1.pdf [file JVI.00259-18_zjv013183633s1.pdf]

1 SUPPLEMENTAL MATERIALS

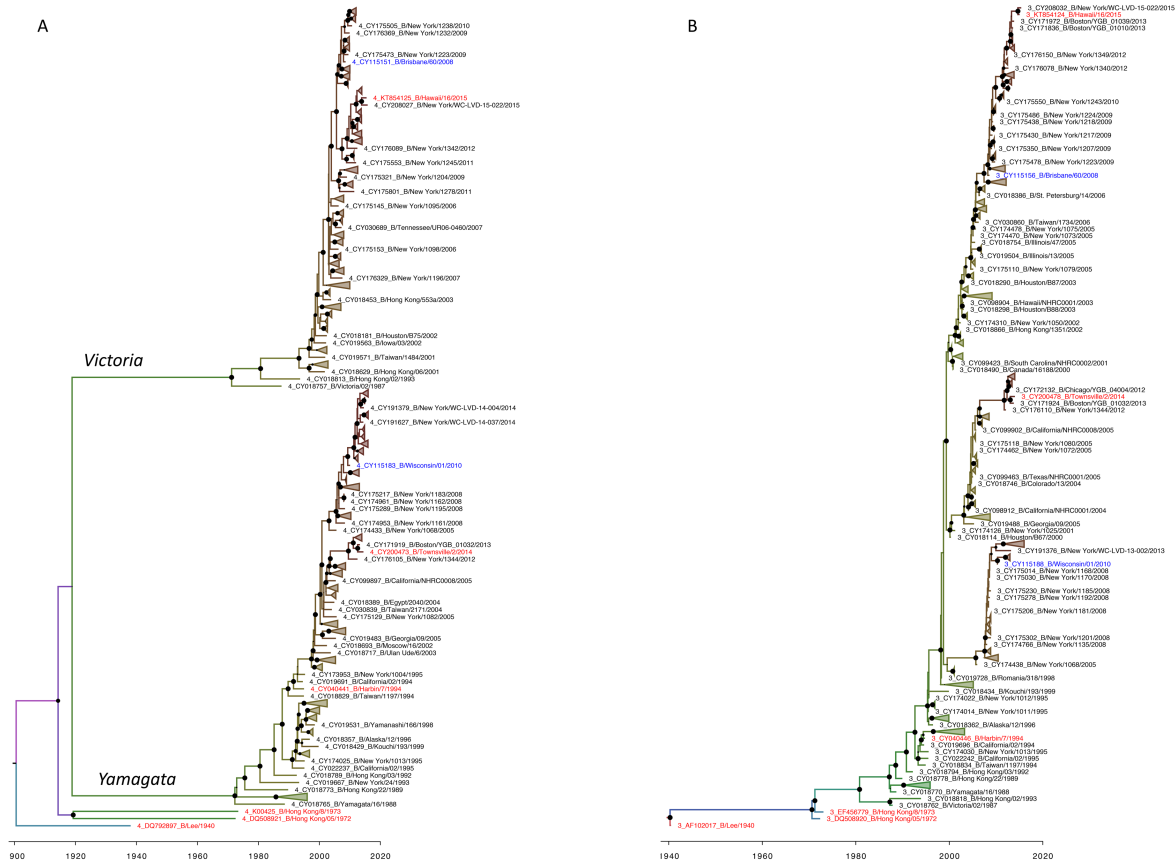

2  
 3 **FIG S1. Phylogenetic relationships of HA and PA genes of IBVs.** Phylogenetic relationships  
 4 of HA (sequence number = 450) and PA (n = 450) genes of IBVs, which were downloaded from  
 5 the database of Influenza Virus Resource  
 6 (<https://www.ncbi.nlm.nih.gov/genome/viruses/variation/flu/>), were reconstructed using time-  
 7 resolved Bayesian inference method implemented in BEAST (v1.8.4) (1). GTR + I + G  
 8 substitution (2), uncorrelated relaxed clock with lognormal distribution, and Bayesian skygrid  
 9 coalescent tree were selected for the analysis. MCMC runs were evaluated using Tracer (v1.6)  
 10 (<http://tree.bio.ed.ac.uk/software/tracer/>). Maximum clade credibility trees were obtained using  
 11 TreeAnnotator (v1.8.4) and were visualized using Fig Tree (v1.4.3)  
 12 (<http://tree.bio.ed.ac.uk/software/figtree/>).

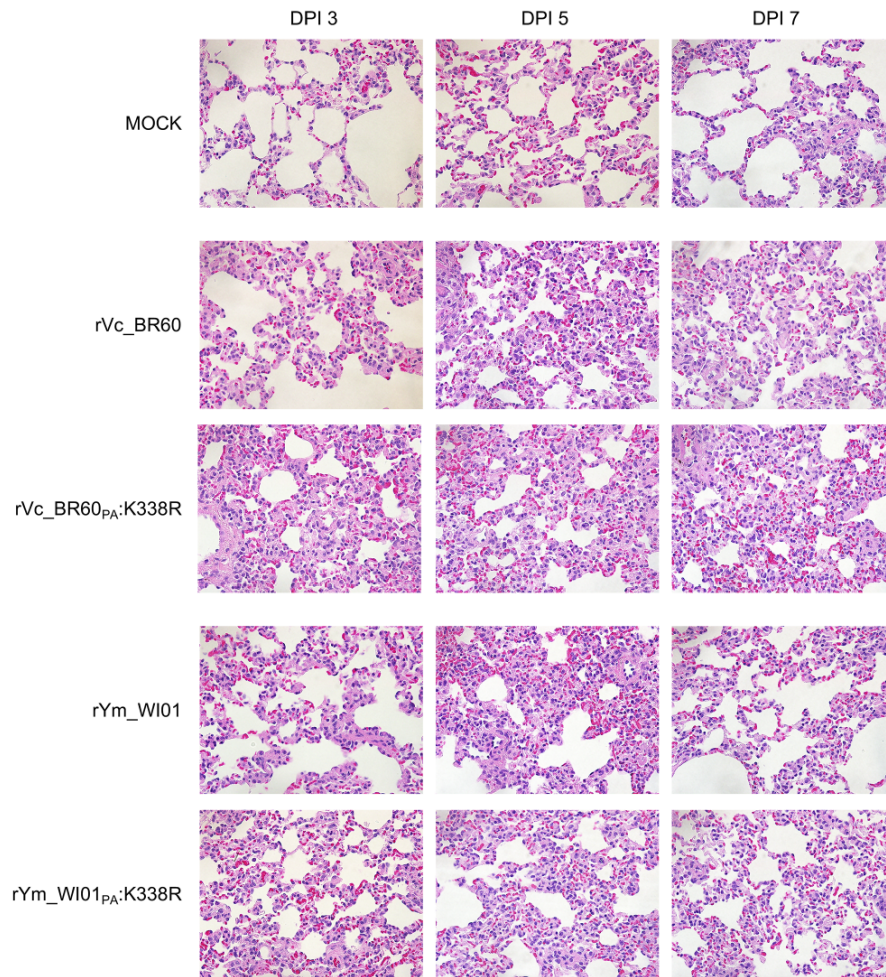

13

14 **FIG S2. Effects of the PA K338R mutation on IBV pathogenicity in ferrets.** The pathogenic  
 15 effects of the PA K338R mutation were evaluated using H&E slides (x100 magnification) of the  
 16 ferret lungs infected with Vc\_BR60-backed (WT and PA K338R mutant) and Ym\_WI01-  
 17 backed (WT and PA K338R mutant) viruses. PBS was used for mock infection.

18

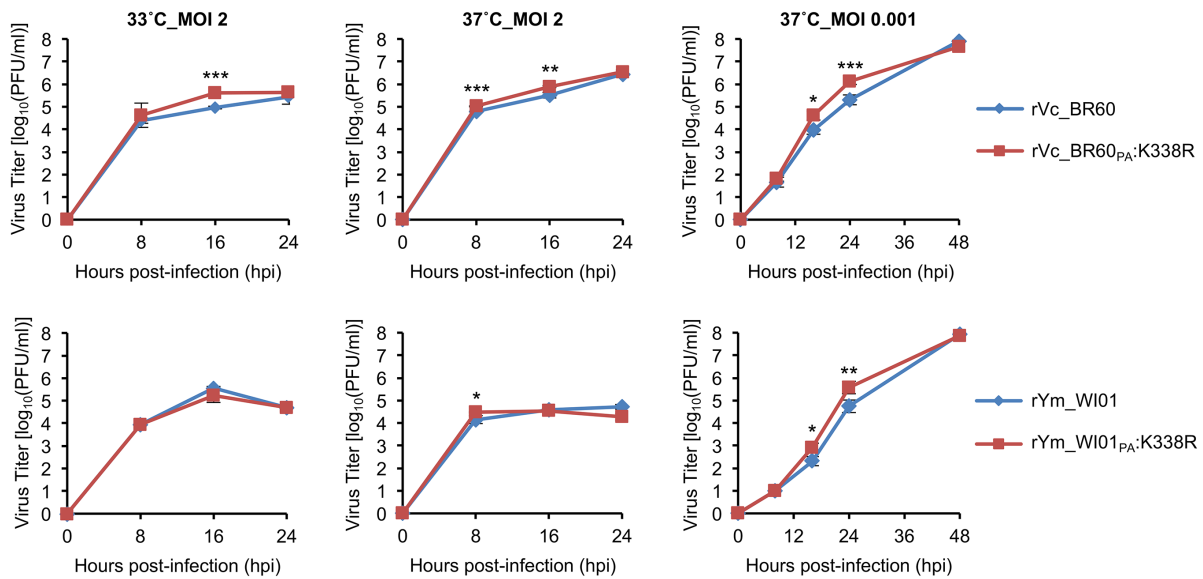

19

20 **FIG S3. Growth kinetics analysis of rVc\_BR60, rYm\_WI01 and their PA K338R mutants**

21 **in MDCK cells.** Replication property of rVc\_BR60, rYm\_WI01 and their PA K338R mutants

22 was evaluated in MDCK cells by changing conditions of the multiplicity of infection (MOI = 2

23 and 0.001) and incubation temperature (33 °C and 37 °C). For single-cycle replication condition

24 (MOI = 2), cell supernatants were collected at 8, 16 and 24 hpi, and for multi-cycle replication

25 condition (MOI = 0.001), cell supernatants were collected at 8, 16, 24 and 48 hpi. \*,  $P < 0.05$ , \*\*,  $P < 0.01$  and \*\*\*,  $P < 0.001$  (compared with the virus titers of rVc\_BR60 and rYm\_WI01,

26 respectively).

27

28

29

30

31

32

33

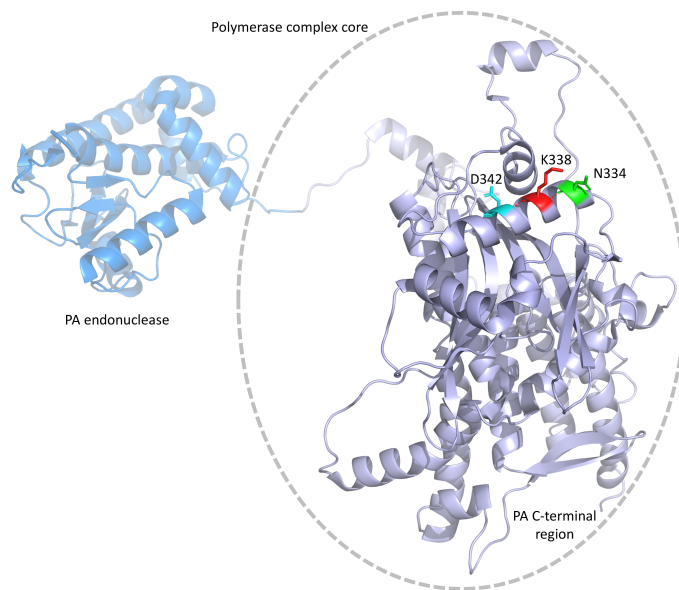

34

35 **FIG S4. PA 338 and its neighboring residues in the crystal structure of IBV PA.** Using the  
36 crystal structure of IBV PA protein (PDB ID: 5FMZ) (3), PA 338 and its neighboring residues  
37 were indicated with different colors (Residue 334, green; 338, red; and 342, cyan). PA  
38 endonuclease (marine blue), polymerase complex core (light blue) and C-terminal region (light  
39 blue) were also indicated based on the study of Thierry et al. (3). The PyMOL Molecular  
40 Graphics System (v2.0.6; Schrodinger LLC, <https://pymol.org>) was used for the visualization of  
41 PA residues and domains.

42

43

44

45

46

47

48

49 **Table S1. IBV strains harboring the PA K338R mutation**

| Virus               | GenBank accession no. | Amino acid signature at PA residue 338 |
|---------------------|-----------------------|----------------------------------------|
| B/Brisbane/60/2008  | CY115156              | K                                      |
| B/Wisconsin/01/2010 | CY115188              | K                                      |
| B/Lee/1940          | CY115116              | R                                      |
| B/Hong Kong/05/1972 | DQ508920              | R                                      |
| B/Hong Kong/8/1973  | EF456779              | R                                      |
| B/Harbin/7/1994     | AF170570              | R                                      |
| B/Townsville/2/2014 | CY200478              | R                                      |
| B/Hawaii/16/2015    | KT854124              | R                                      |

50

51

52

53

54

55

56

57

58

59

60

61

62

63 **References**

- 64 1. Drummond AJ, Suchard MA, Xie D, Rambaut A. 2012. Bayesian phylogenetics with  
65 BEAUti and the BEAST 1.7. *Mol Biol Evol* 29:1969-73.
- 66 2. Tavaré S. 1986. Some probabilistic and statistical problems in the analysis of DNA  
67 sequences. *Lectures on Mathematics in the Life Science*:57-86.
- 68 3. Thierry E, Guilligay D, Kosinski J, Bock T, Gaudon S, Round A, Pflug A, Hengrung N,  
69 El Omari K, Baudin F, Hart DJ, Beck M, Cusack S. 2016. Influenza Polymerase Can  
70 Adopt an Alternative Configuration Involving a Radical Repacking of PB2 Domains.  
71 *Mol Cell* 61:125-37.  
72
